# Supplementary material
Source: PubMed Central journal article supplement (PMC5214740)
Supplement: NIHMS6329-supplement-1.pdf [file NIHMS6329-supplement-1.pdf]

## **A 3D engineered tumour for spatial snap-shot analysis of cell metabolism and phenotype in hypoxic gradients.**

Darren Rodenhizer<sup>1</sup>, Edoardo Gaude<sup>2</sup>, Dan Cojocari<sup>3</sup>, Radhakrishnan Mahadevan<sup>1,4</sup>, Christian Frezza<sup>2</sup>, Bradly G. Wouters<sup>3</sup>, Alison P. McGuigan<sup>1,4</sup> \*

<sup>1</sup> University of Toronto, Department of Chemical Engineering and Applied Chemistry  
200 College St. Toronto, ON M5S 3E5, Canada, Phone: 416 978 7552

<sup>2</sup> MRC Cancer Unit, University of Cambridge, Hutchison/MRC Research Centre, Box 197,  
Cambridge Biomedical Campus, Cambridge, CB2 0XZ, United Kingdom

<sup>3</sup> Princess Margaret Cancer Centre and Campbell Family Institute for Cancer Research,  
Departments of Medical Biophysics and Radiation Oncology, University Health Network,  
Toronto, ON M5G 2M9, Canada

<sup>4</sup> Institute of Biomaterials and Biomedical Engineering, University of Toronto

\* *To whom correspondence show be addressed* ([Alison.mcquigan@utoronto.ca](mailto:Alison.mcquigan@utoronto.ca))

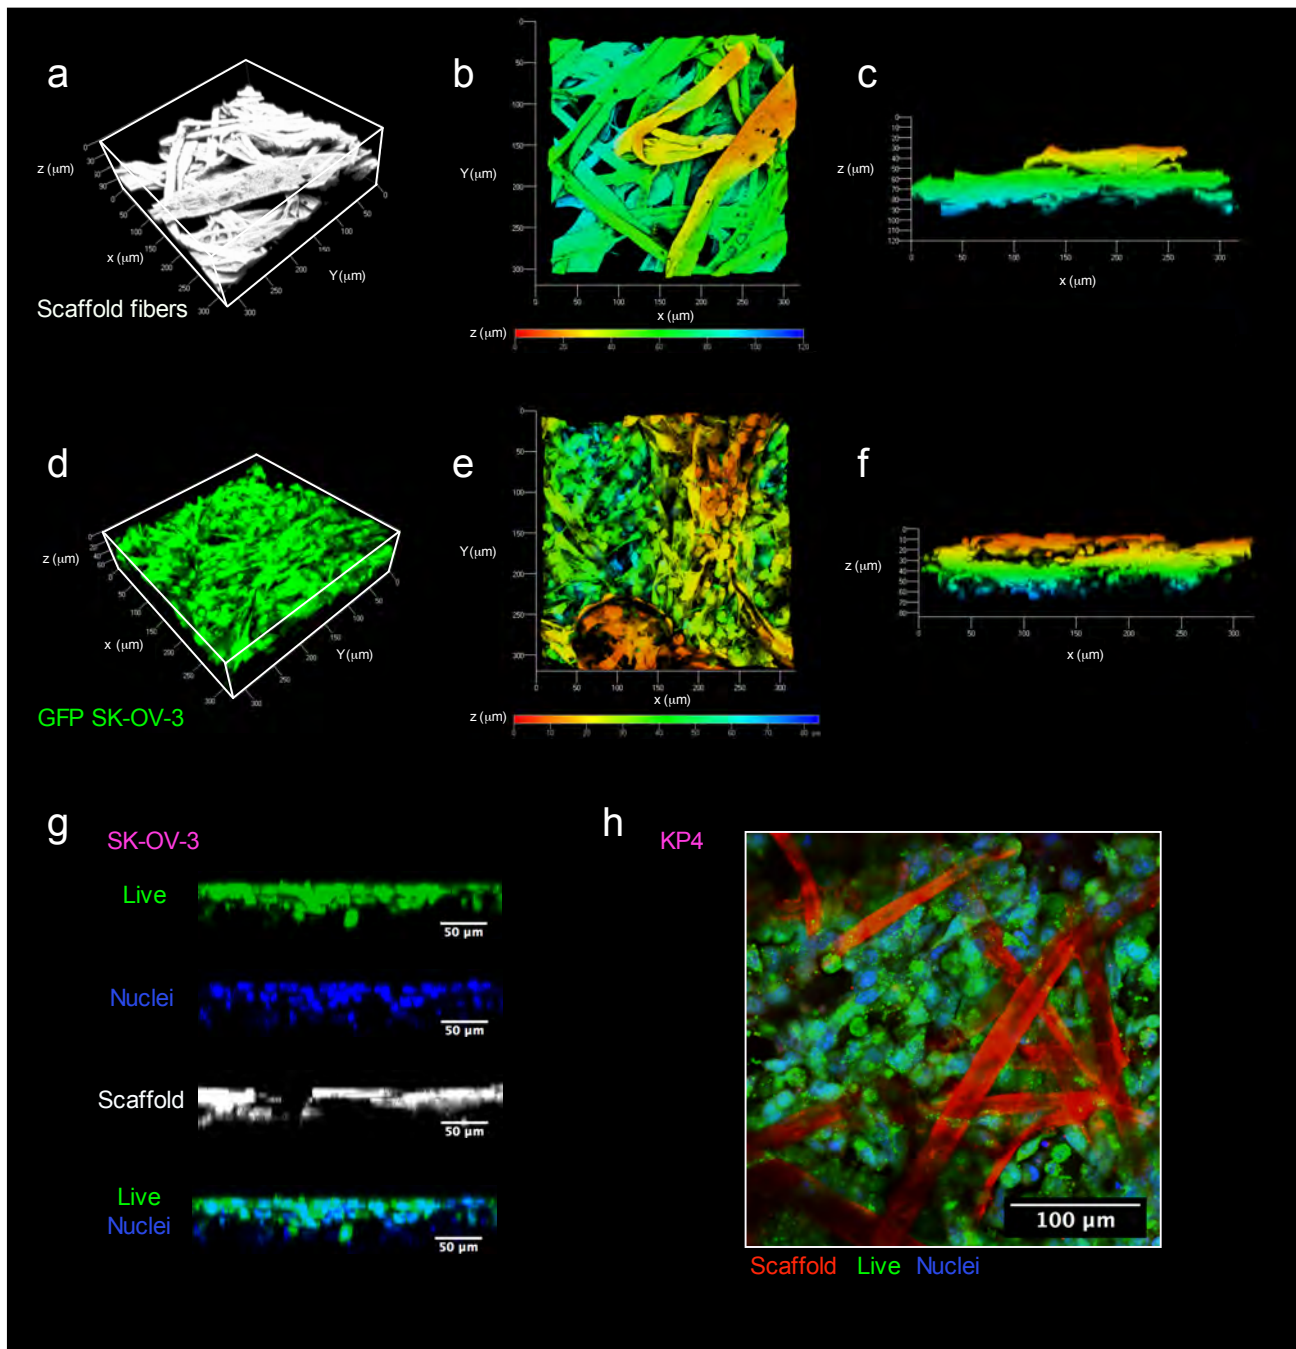

**Supplementary figure 1: Confocal depth profiling of scaffold and a single biocomposite layer.** a-c – 3D confocal reconstruction of the cellulose scaffold showing interlocking of fibers (a) and color coded to map the depth of fibers within the scaffold relative to the top of the z-stack, in a top down view (b) and side profile (c). Detailed fiber imaging was achieved by labelling the scaffold with fluorescein. d-f – 3D confocal reconstruction of a separate biocomposite sample shows the thick and 3D nature of SK-OV-3 cells expressing GFP within the scaffold (d) and color coded to indicate the depth of individual cells relative to the top of the z stack in a top down view (e) and side view (f). After remodelling the thickness of the biocomposite strip was  $34.19 \mu\text{m} \pm 4.38 \mu\text{m}$  (mean  $\pm$  SEM for n=18). g – side profile projections (50 μm of thickness) showing 3D structure of biocomposite and indicating live cells (green – calcein AM), nuclei (blue – DRAQ5) and the scaffold (autofluorescence), and combined. h – Interlocking of cells and scaffold fibers is demonstrated in this 2 μm thick confocal section of a biocomposite containing live KP4 cells (green-calcein AM), nuclei (blue – DRAQ5) and scaffold fibers (red – autofluorescence).



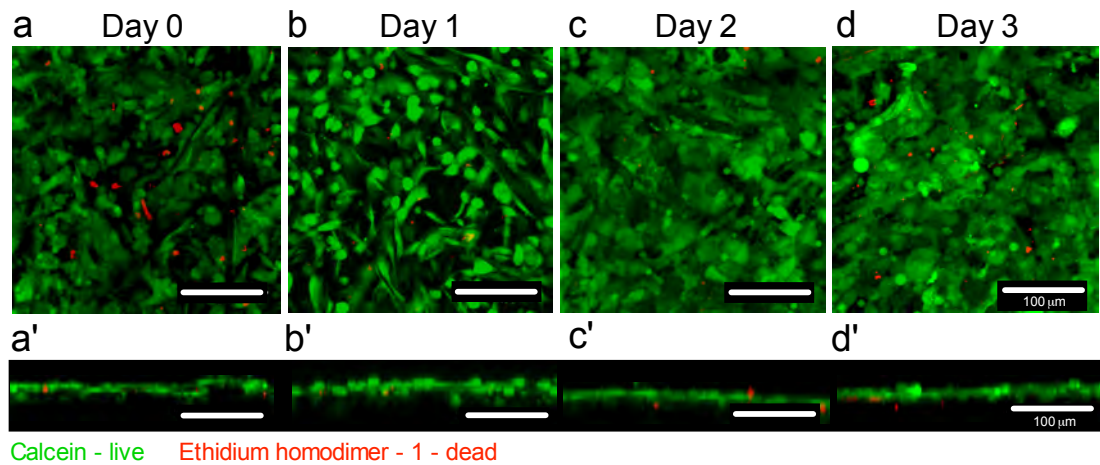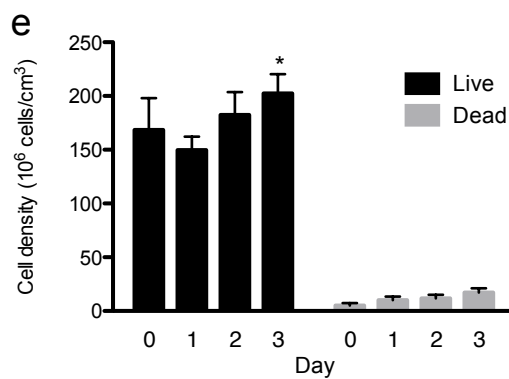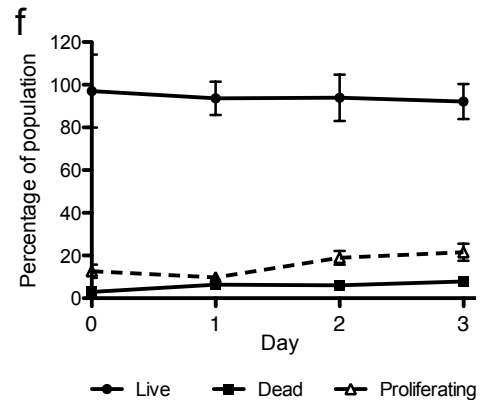

**Supplementary figure 2: Cell viability and growth in single biocomposite layer.** a-d - Live (green – calcein AM) and dead (red – ethidium homodimer 1) stained cells in a single non-rolled biocomposite layer after (a) 0, (b) 1, (c) 2, or (d) 3 days of culture. Images a'-d' show side profile reconstructions of the layer (50μm thickness). e- Live and dead cell density in the biocomposite as a function of time. Live cells numbers at day 3 are significantly different than day 1 ( $p \leq 0.05$ ). f – Percentage of live, dead and proliferating cells in the non-rolled construct over time. Graphs e and f were produced from quantitative analysis of confocal images stained for nuclei (DRAQ5), dead cells (ethidium homodimer-1) and proliferating cells (KI67 positive). Error bars are SEM for  $n = 9$  measurements from 3 samples.

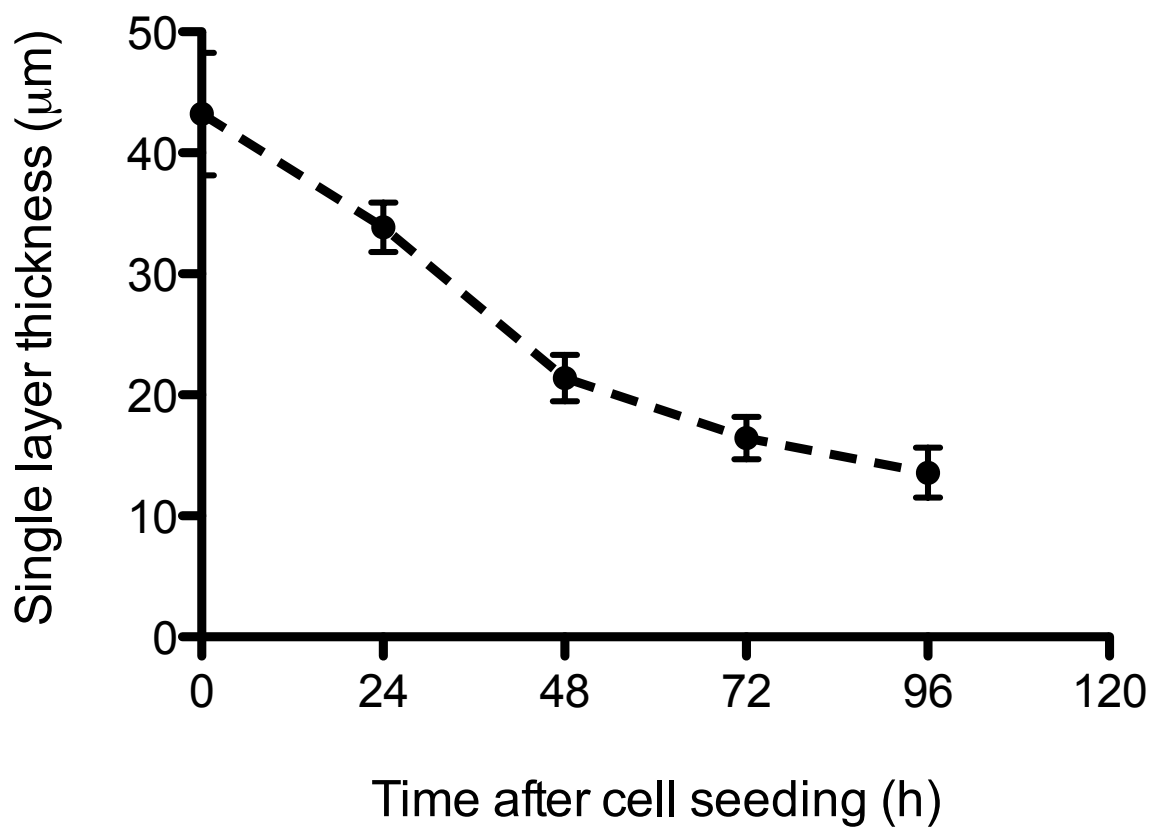

**Supplementary figure 3: Single layer thickness as a function of time.** To assess cell remodelling in the biocomposite, single layers were cultured for 0, 1, 2, and 3 days followed by calcein AM staining to label live cells. Confocal Z-stacks were acquired from each sample and used to assess biocomposite thickness. Cell remodelling results in layer compaction, which plateaus after 2 days. It was observed that layer integrity is achieved after 24h, which allows handling, and rolling of the strip. Error bars are standard deviation (n = 3).

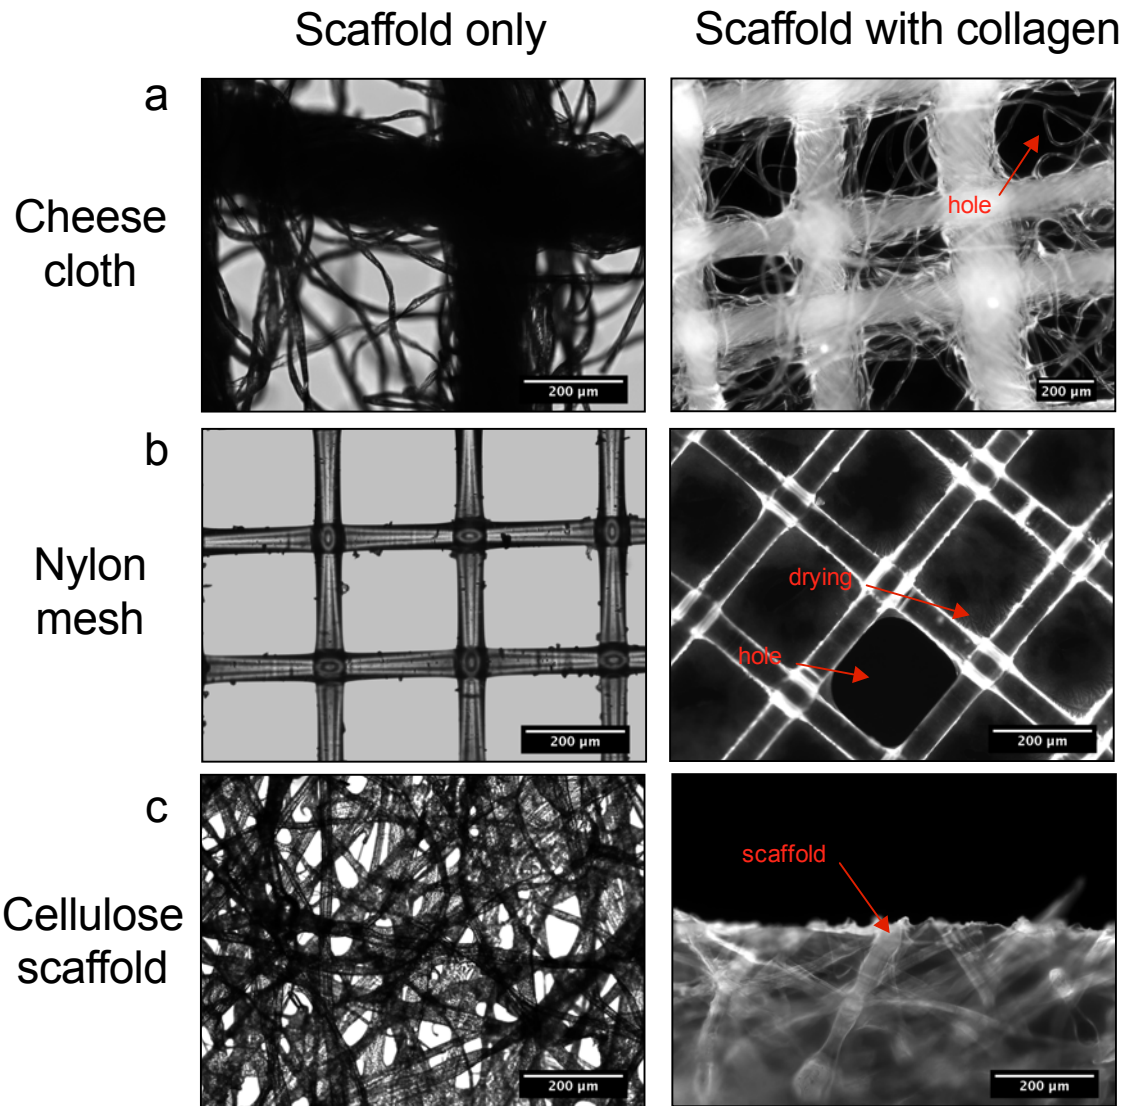

**Supplementary figure 4: Scaffold Materials Selection.** Scaffold selection was based on the ability to gel a thin layer of collagen of consistent thickness without excessive drying of the collagen, or formation of holes or voids. Fluorescein was added to the collagen to aid in visualization. Brightfield and fluorescence images of: a- #90 grade cheese cloth without and with collagen showing large variability in collagen sheet thickness due to large and varying pore sizes. b- Nylon mesh without and with collagen showing drying of the collagen and void formation. c- Cellulose scaffolding without and with collagen showing consistent collagen gelling and thickness without excessive drying.

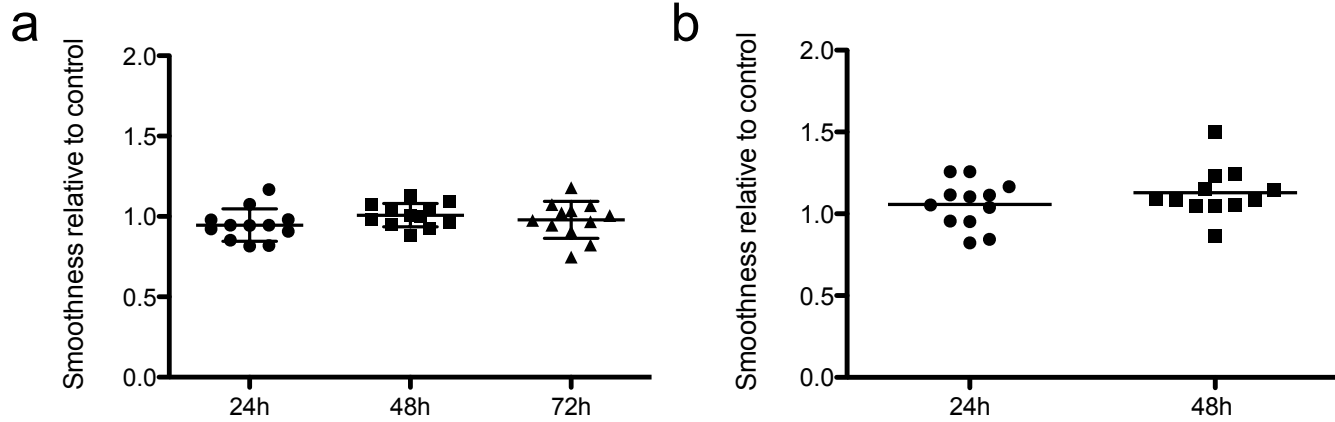

**Supplementary figure 5: Scaffold integrity after unrolling.** The smoothness of layer interfaces in the TRACER were assessed after unrolling to determine if the sectioning process resulted in layer destruction (identified by a decrease in smoothness compared to a non-rolled layer surface). a- smoothness measurements in TRACERs containing SK-OV-3 cells after 1, 2 and 3 days of rolled culture and b- KP4 cells after 1 and 2 days of rolled culture. Smoothness at each time point was not significantly different between any groups. Smoothness measurements were normalized to the appropriate interface of a layer that was never rolled, but was cultured for 24h. n = 12 measurements were made from 1 TRACER at each time point for both (a) and (b).

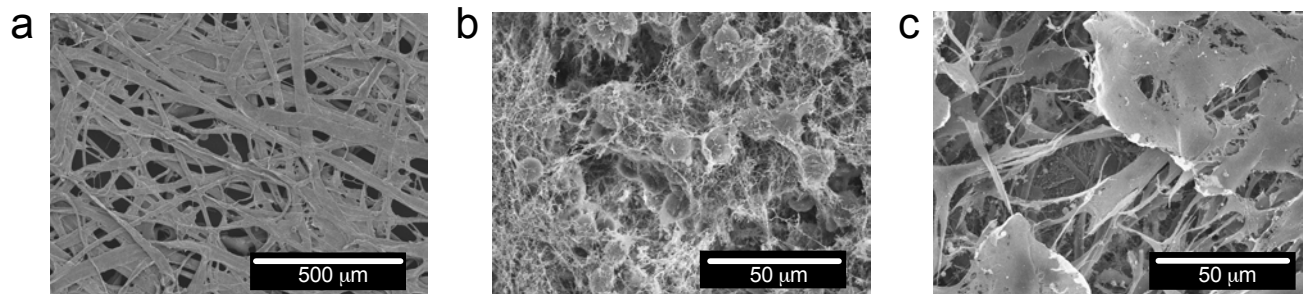

**Supplementary figure 6: SEM characterization of a single layer biocomposite.** a- SEM of cellulose scaffold before infiltration with collagen and cells. b – SEM of scaffold containing NIH 3T3 fibroblast cells and collagen immediately after cell seeding. Cells can be seen as rounded structures surrounded by collagen fibers. c – SEM of biocomposite after 24h of culture showing cells as flat, stretching structures with supporting collagen fibers.



Time after seeding in dish

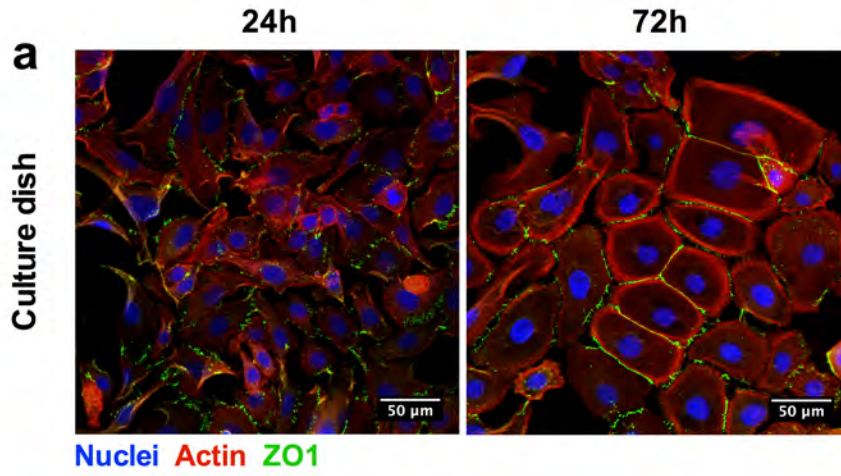

Time after seeding in collagen or scaffold

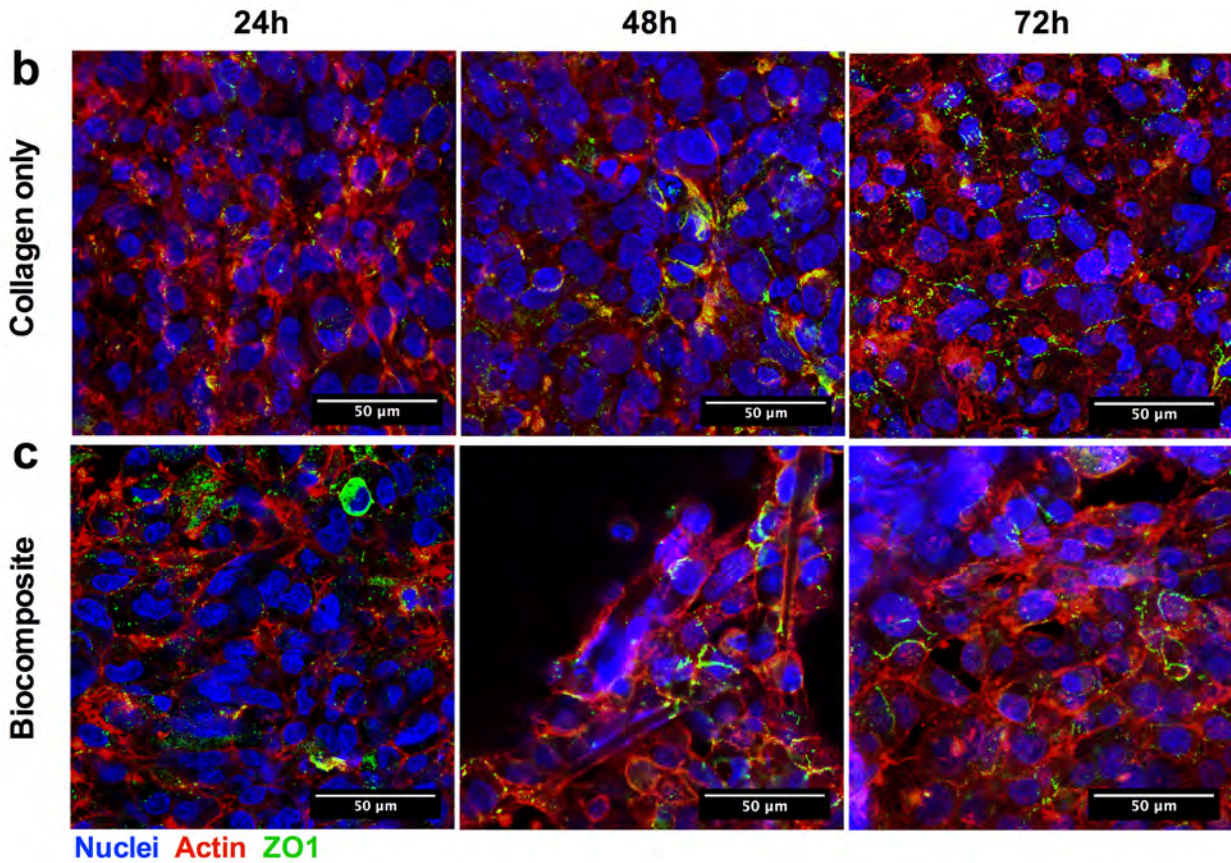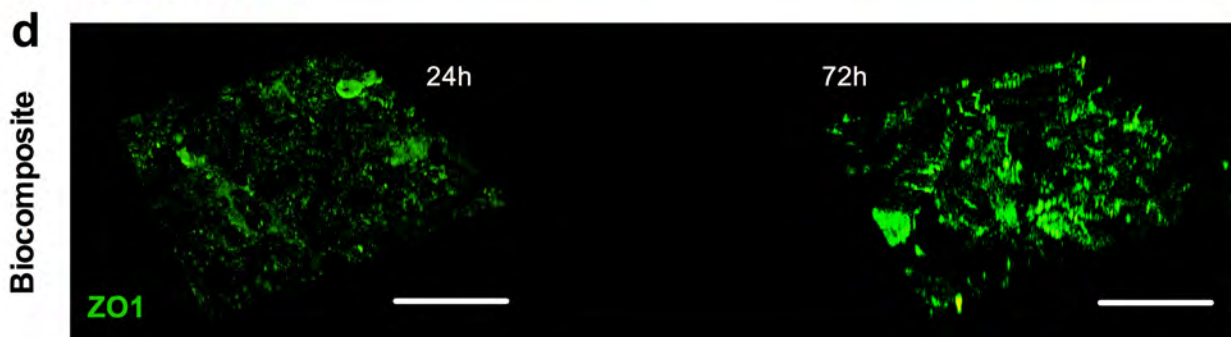

**Supplementary Figure 7: Junction maturation of a single layer biocomposite.** a – Thin (2 $\mu$ m) confocal optical sections showing the actin cytoskeleton of SK-OV-3 cells after 24, and 72h in a 2D culture dish. b-c - Thin (1-10 $\mu$ m) z projections of SK-OV-3 cells in collagen only gel (b) or the biocomposite (c) after 24, 48, or 72h of culture . Actin fibres are labelled with phalloidin (red), ZO-1 (green) indicates the presence of cell-cell junctions, and nuclei are labelled with DRAQ5 (blue). Similar cell morphologies are observed in both (b) and (c) at each time point with junctions appearing most mature at 72h. d- 3D projections of ZO-1 junctions in the biocomposite at 24 and 72h.

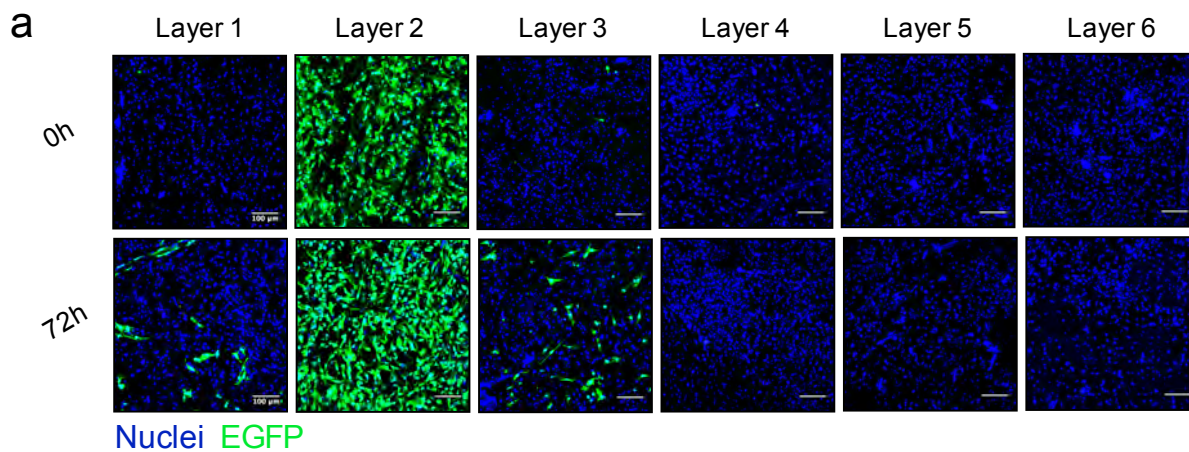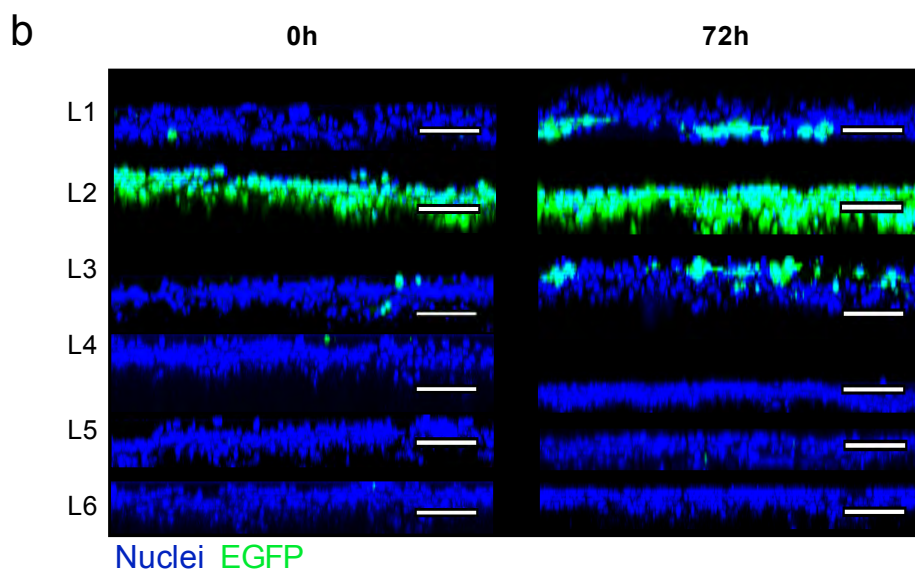

**Supplementary Figure 8: Cell migration between adjacent TRACER layers.** – To assess cell movement of SK-OV-3 cells between adjacent layers, TRACERS were fabricated with GFP positive cells in layer 2 and wild type cells in all other layers and cultured in the rolled configuration for 3 days. TRACERS were then unrolled and assessed with confocal microscopy for movement of the GFP cells to adjacent layers. a- confocal z-projections showing nuclei (DRAQ5 – blue) and GFP positive cells (green) in each layer of a TRACER before rolling and after 3 days of rolled culture. Minor GFP cell transfer can be seen on adjacent surfaces to layer 2. b- Images from (a) presented as side profiles.



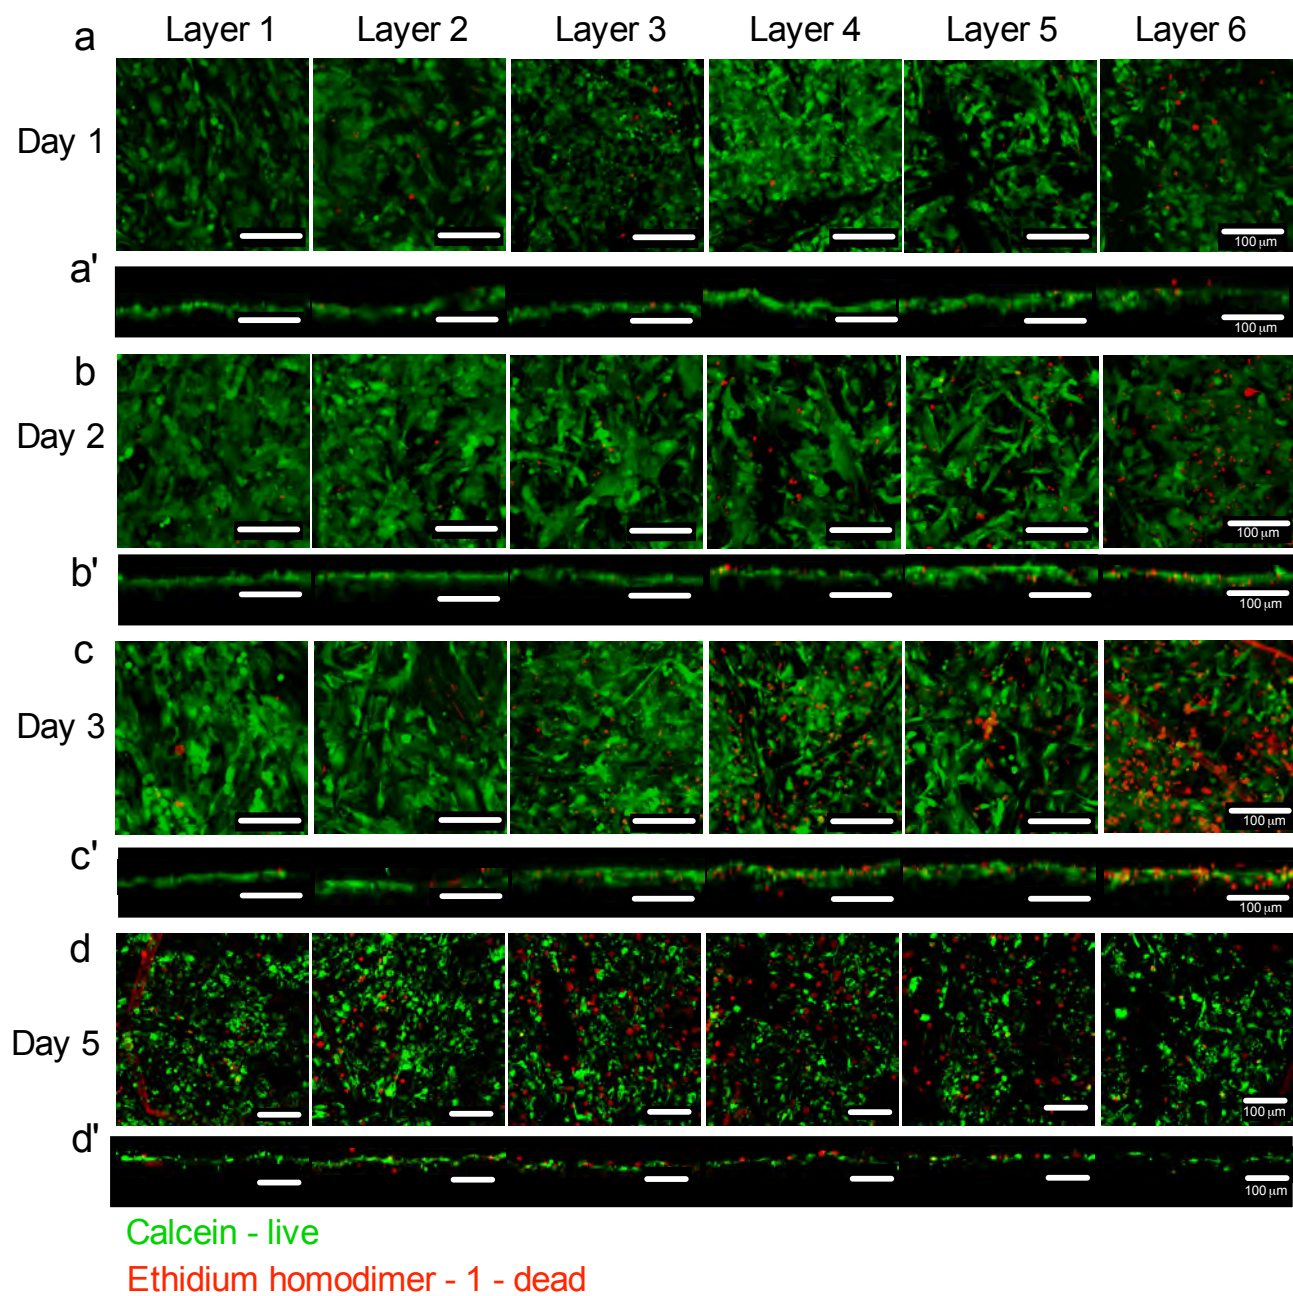

**Supplementary Figure 9: Cell viability in each layer of the TRACER over time.** a-d - Live cells (green) and dead cells (red) in each layer of the TRACER after (a) 1, (b) 2, (c) 3 and (d) 5 days of assembled culture. For each layer a top down projection and side profile are displayed (a'-d'). Note day 5 images show significantly less live cells.

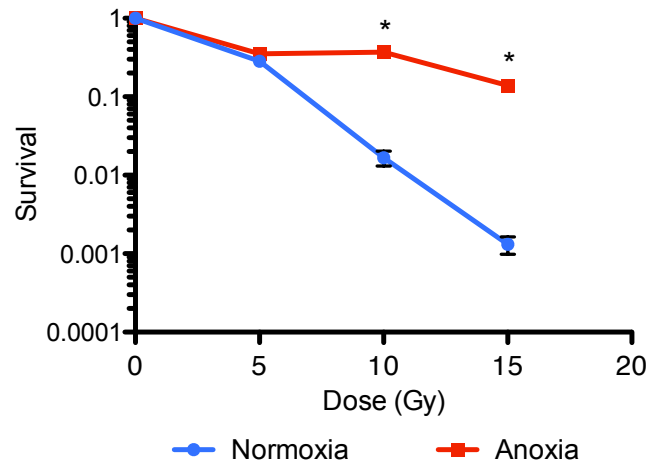

**Supplementary Figure 10: Single layer normoxia and anoxia radiation dose controls.** A single biocomposite layer maintained in either 21% pO<sub>2</sub> (normoxia) or 0% pO<sub>2</sub> (anoxia) was dosed with either 5, 10, or 15 Gy of radiation. Cell survival was assessed with a clonogenic assay. Data shows cells in anoxia are more resistant to radiation therapy when compared with those in normoxia. Data is normalized to a single layer cultured for 24h in normoxia and not treated with radiation. Error bars are SEM for n = 6 to 15 measurements from 1 or 2 samples. \* indicates statistically significant differences with  $p \leq 0.05$



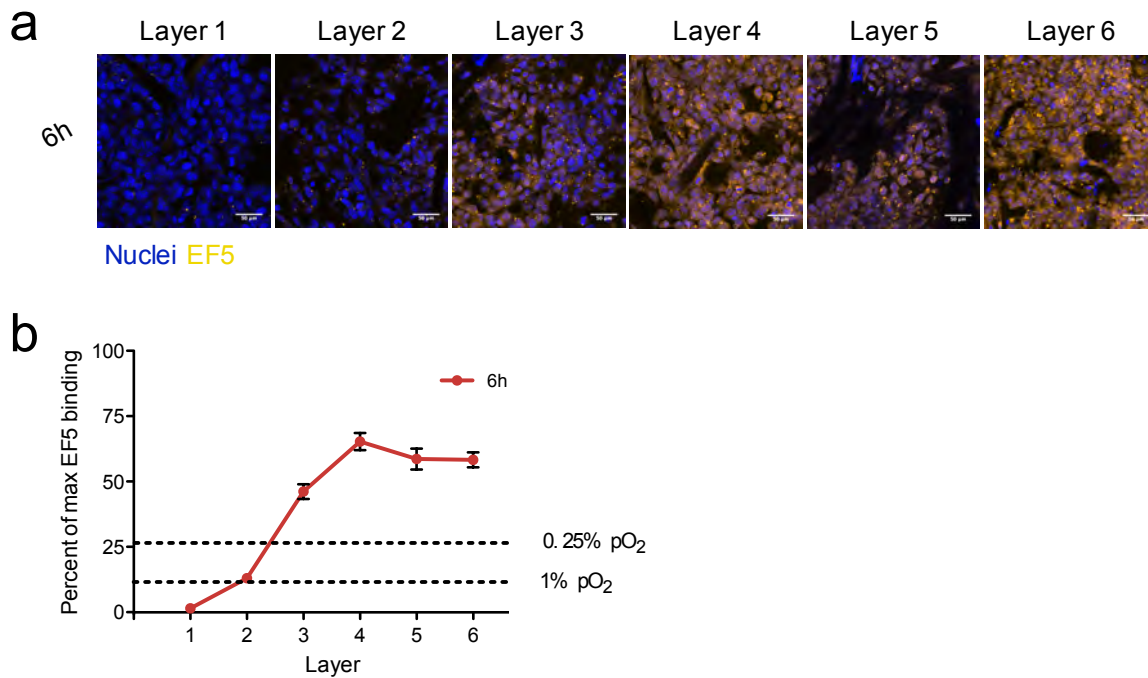

**Supplementary Figure 11: Oxygen gradient measurements in TRACERs containing KP4 cells.** a- EF5 staining in a TRACER containing KP4 cells and cultured in a rolled configuration for 6h. EF5 staining is shown in yellow and nuclei are shown in blue (DRAQ5). Images are 2um thick confocal optical sections. b- Nuclear EF5 staining intensity quantification of KP4 cells after 6h in the TRACER. Error bars are SEM for n = 18 measurements from 3 TRACERs.

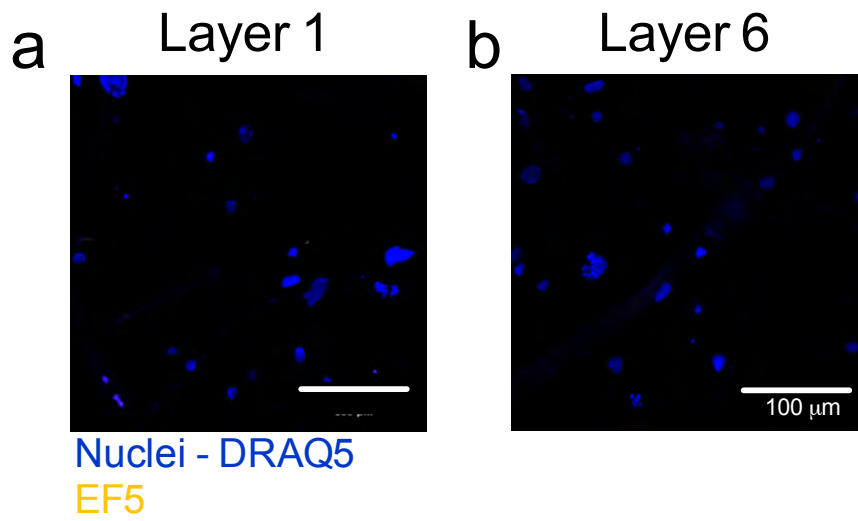

**Supplementary figure 12: EF5 staining is absent in low cell density TRACERs.** a-b- EF5 and nuclear staining in layers (a) 1 and (b) 6 of a low cell density ( $1 \times 10^7$  cells/ mL collagen) TRACER after 24h of rolled culture. EF5 staining is shown in yellow and nuclear staining is shown in blue (DRAQ5) in each image. All scale bars are 100 microns. No EF5 staining is observed in either layer indicating no oxygen gradient is generated when low numbers of cells are present in the construct. This confirms that oxygen depletion to hypoxic levels in the inner layers of the TRACER occurs as a result of cellular consumption.

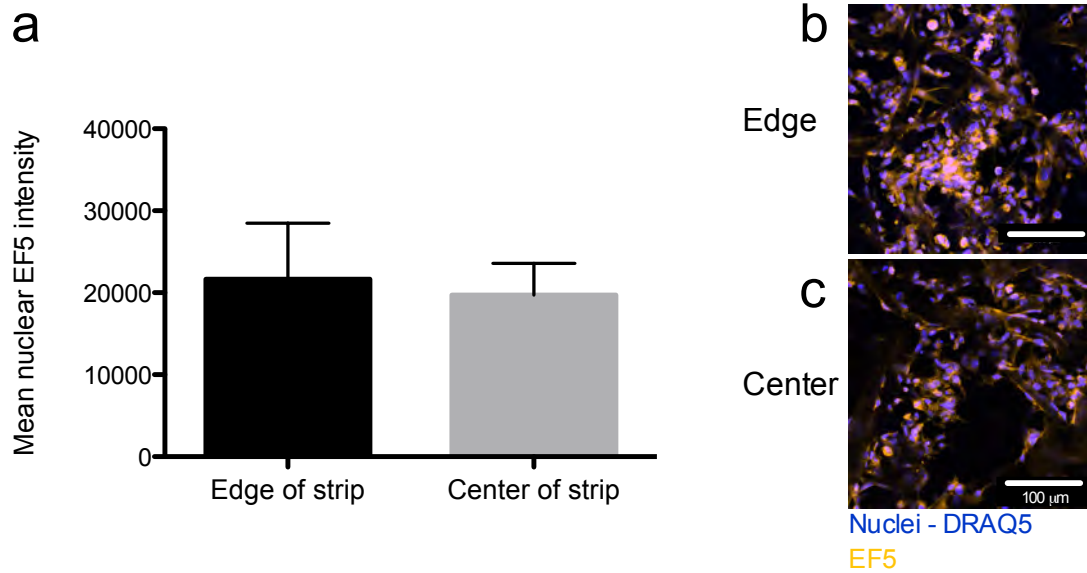

**Supplementary figure 13: Oxygen levels at the edge versus centre of a layer.** a- EF5 and nuclear staining in layer 6 of a TRACER ( $1 \times 10^8$  cells/mL collagen) after 12h of rolled culture at edge and centre locations (error bars are standard deviation from  $n = 6$  images). Intensity at the edge versus centre of the strip was not statistically different (t-test,  $p = 0.56$ ) b-c – Confocal images of EF5 staining at an edge (b) versus centre (c) location. EF5 staining is shown in yellow and nuclear staining is shown in blue (DRAQ5) in each image. No significant differences were observed in the levels of hypoxia in regions of a single layer located at the edge (proximal to the core) versus the centre of a layer. This suggests that oxygen levels were homogeneous between the edge and the centre regions of each layer.

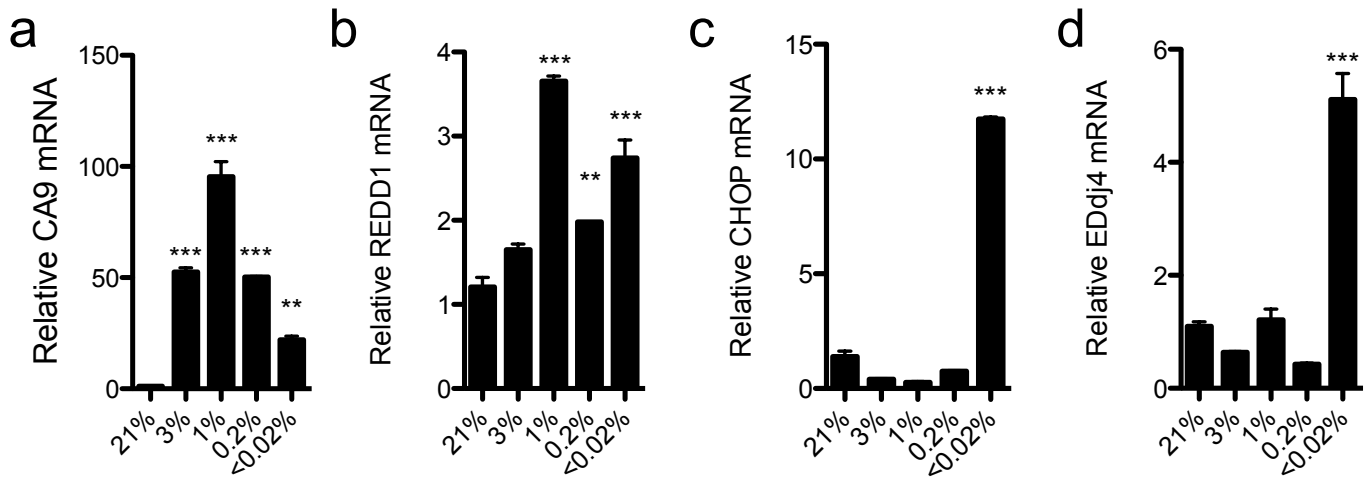

**Supplementary Figure 14: SK-OV-3 cells hypoxia gene profile.** Cells cultured in single layer non-rolled biocomposite sheets were exposed to normoxic (21%) and hypoxic (3%, 1%, 0.2%, <0.02%) conditions for 24h prior to analysis. mRNA of HIF1 $\alpha$  target genes, CA9 (a) and REDD1 (b), and UPR target genes, CHOP (c) and ERdj9 (d), were quantified using qPCR, normalized to housekeeping gene RPL13a and relative to 21% control. Differences were assessed using One-way ANOVA, Dunnett post-test (\*  $p < 0.05$ , \*\*  $p < 0.01$ , \*\*\*  $p < 0.001$ ). Error bars are SEM for  $n = 3$  samples.

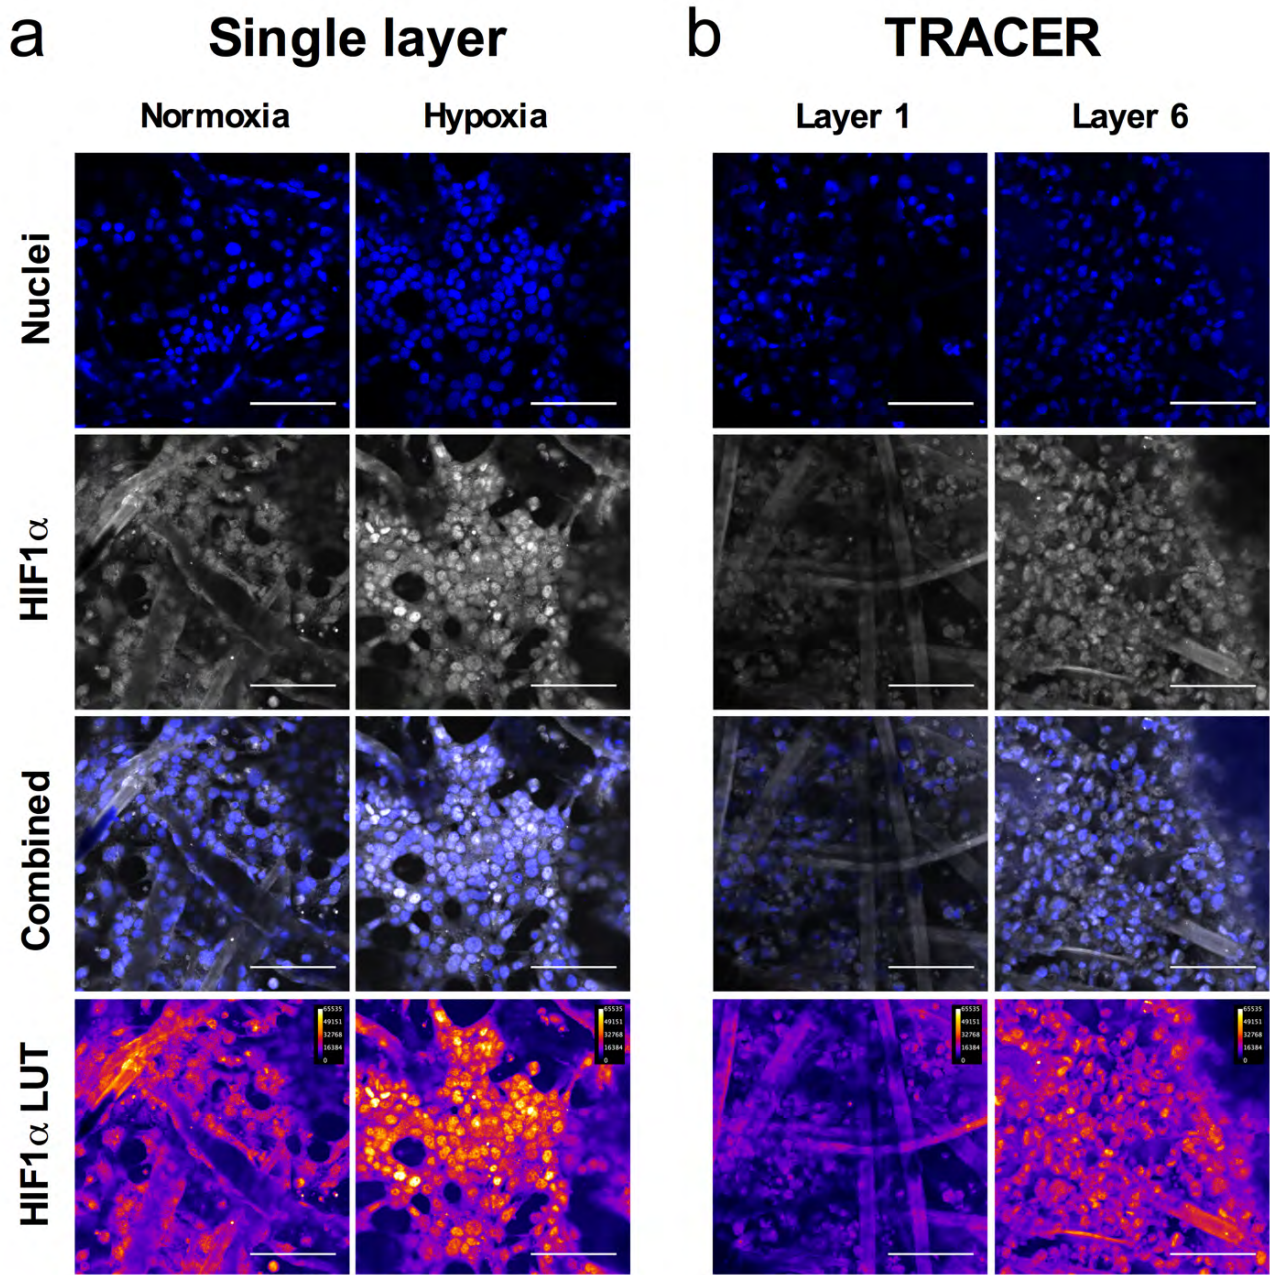

**Supplementary Figure 15: Characterization of HIF1 $\alpha$  localization in TRACER.** a- Single biocomposite layers containing SK-OV-3 cells were cultured in normoxia (21% pO<sub>2</sub>), or exposed to hypoxia (0.2% pO<sub>2</sub>) for 4h prior to fixation and staining for HIF1 $\alpha$ . In hypoxia, HIF1 $\alpha$  is expected to translocate to the nucleus. Images are presented as nuclei (blue – DRAQ5), HIF1 $\alpha$  (TRITC secondary, pseudo-colored white), and combined. To aid in visualization of HIF1 $\alpha$  staining, the FIJI “Fire” LUT was applied to the HIF1 $\alpha$  channel and is included (grayscale ramp provided at top right). b- Comparison panel images of layer 1 and layer 6 of a TRACER cultured for 4h prior to staining as described in (a). Images demonstrate an increase in HIF1 $\alpha$  staining in the nuclear regions of the hypoxia control and layer 6 of the TRACER.



a

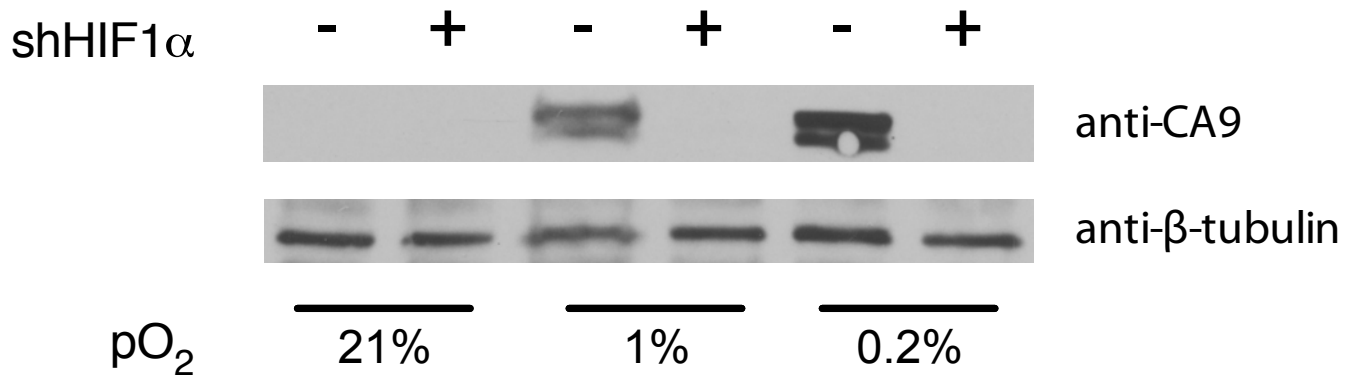

b

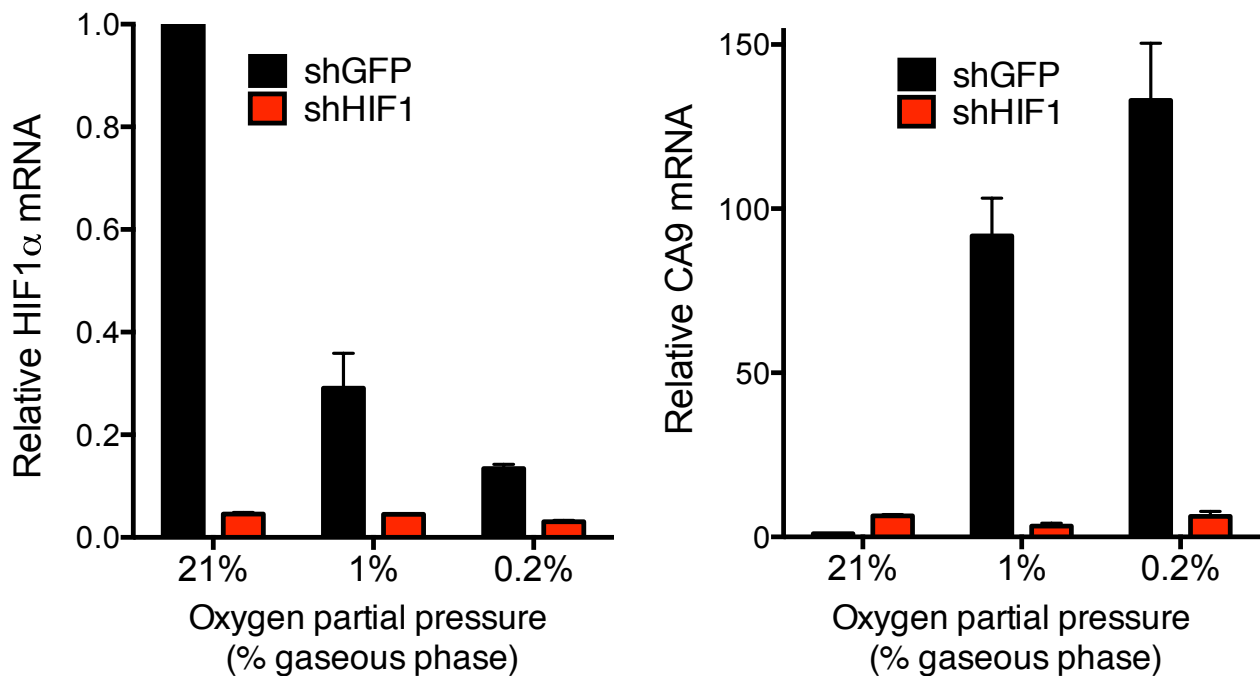

**Supplementary Figure 16: Characterization of HIF knockdown cells SK-OV-3 cells stably expressing HIF1 $\alpha$  shRNA or control shRNA were exposed to normal (21%) or hypoxic conditions (1% and 0.2%) for duration of 24h prior.** a- western blotting was performed with an antibody against the HIF-induced gene, CA9, and anti- $\beta$ -tubulin as control. b- The levels of HIF1 $\alpha$  and CA9 mRNA relative to housekeeping gene RPL13a were quantified using quantitative reverse transcriptase-PCR analysis and normalized to the shGFP, 21% sample. Error bars are SEM with n = 3. HIF1 $\alpha$  levels are significantly lower in shHIF versus shGFP (t-test with Bonferroni correction) at 21 and 0.2% oxygen. CA9 levels are significantly lower in shHIF versus shGFP (t-test with Bonferroni correction) under all conditions.

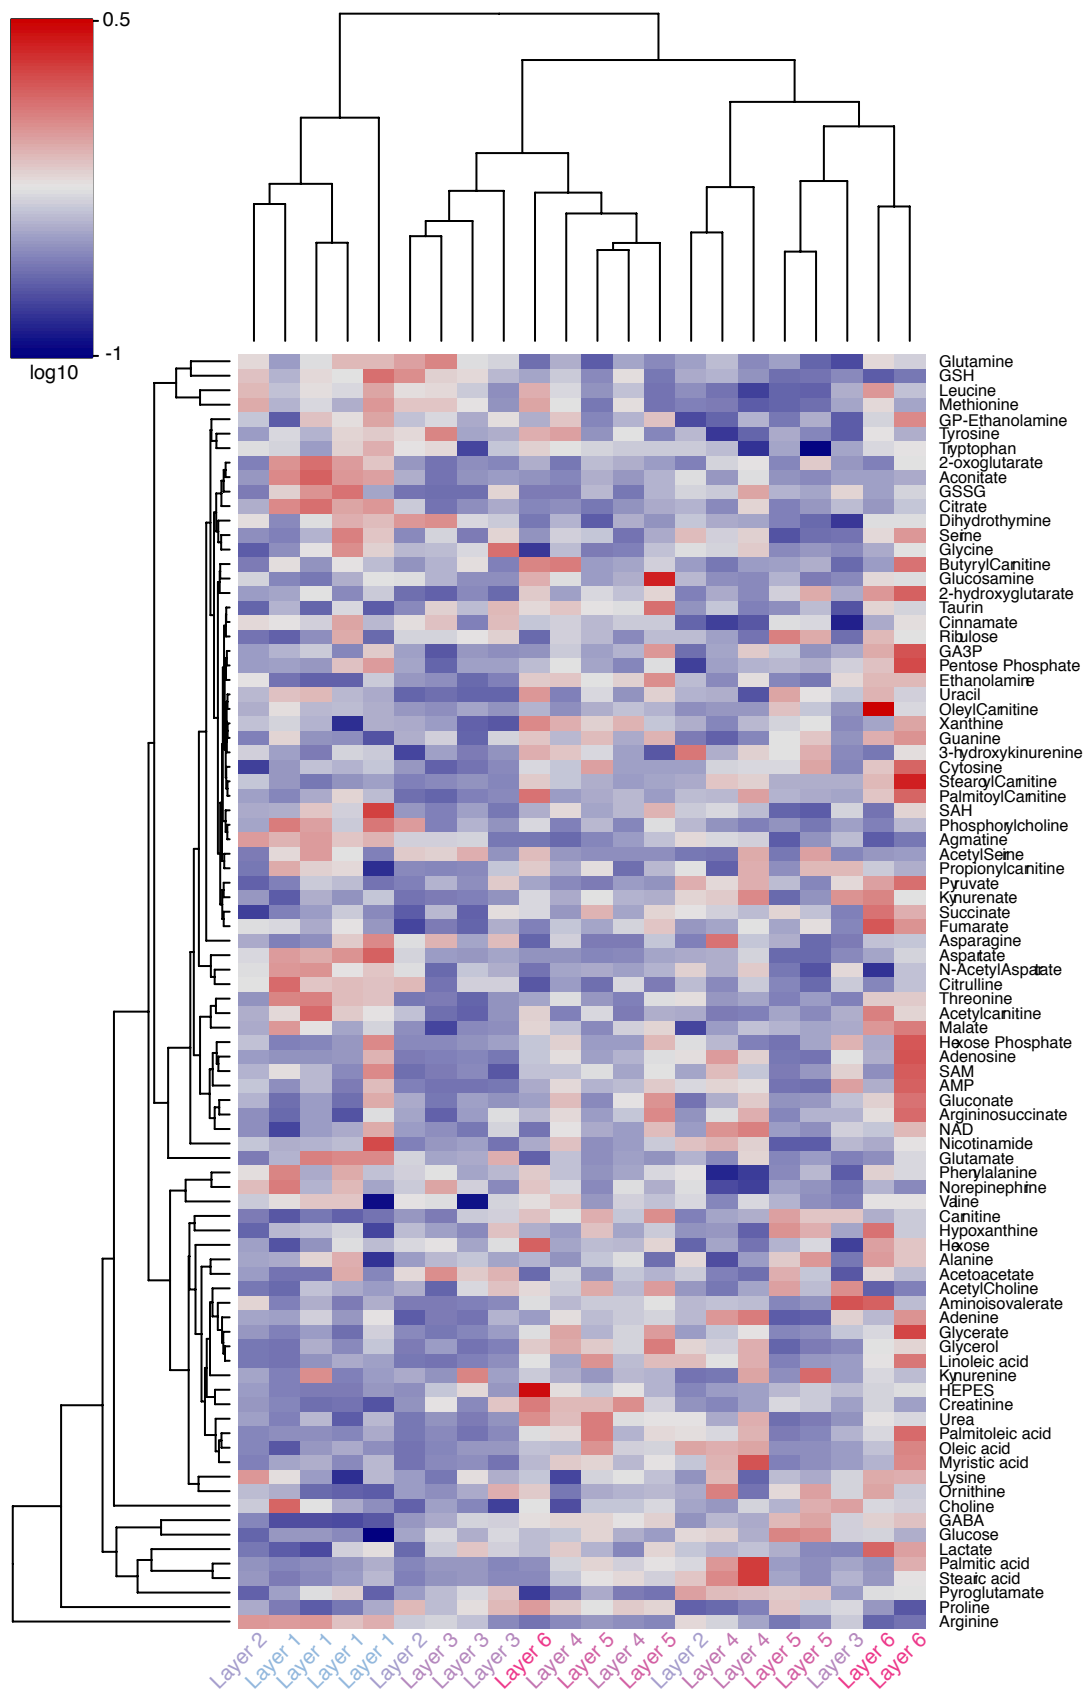

**Supplementary Figure 17: Layer-specific unsupervised metabolomic analysis.** Heatmap analysis of metabolites extracted from the indicated layers. Unsupervised hierarchical clustering of different layers (top dendrogram) and metabolites (left dendrogram) was performed. The log<sub>10</sub> of the relative abundance of each metabolite is color coded as indicated in the figure legend.

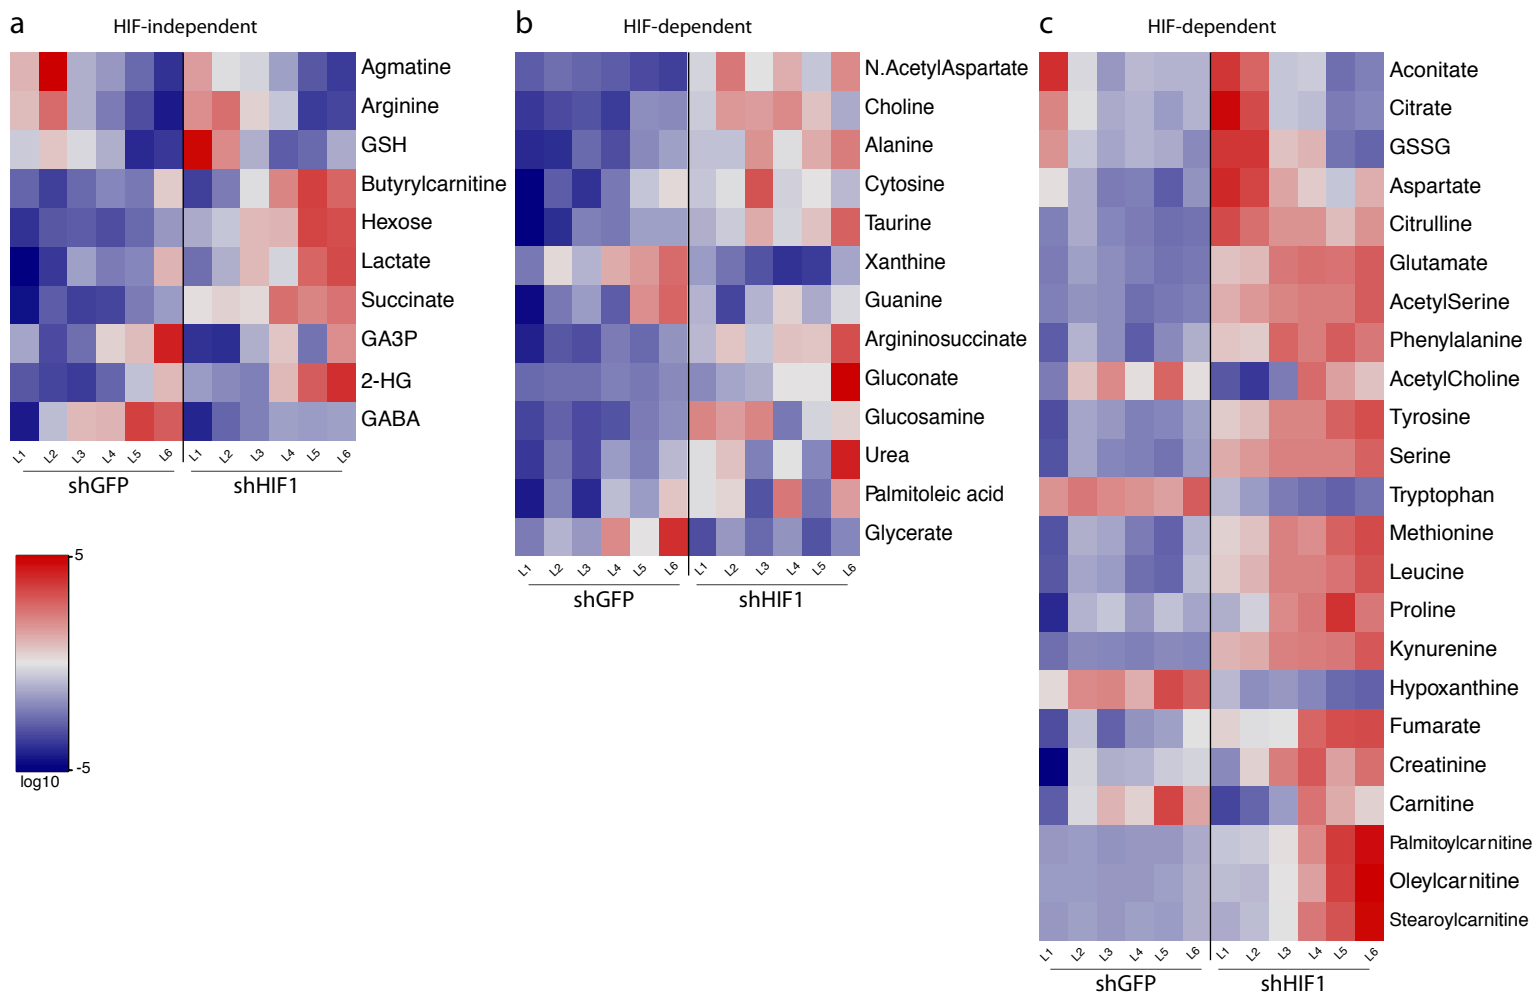

**Supplementary Figure 18: Heatmap representation of metabolite intensities in each layer for metabolites that significantly correlate with hypoxia levels.** Metabolite intensities per layer for metabolites showing significant correlation with hypoxia in both shGFP and shHIF conditions (a), or (b) in shGFP only, or (c) in shHIF only.

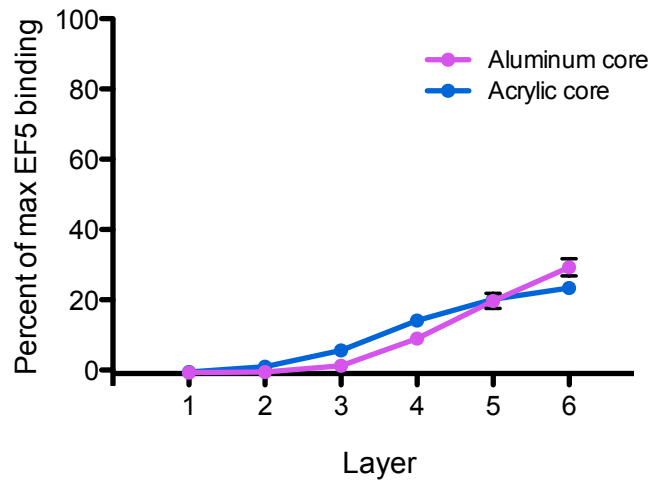

**Supplementary Figure 19: Percent of EF5 binding on aluminum versus acrylic reactor cores.** Acrylic as opposed to aluminum reactor cores were required for radiation experiments to reduce attenuation and ensure uniform irradiation of the cells. TRACERs assembled on acrylic versus aluminum cores showed similar EF5 binding gradients, confirming oxygen could not significantly diffuse through the acrylic core. Error bars are SEM for n = 18 measurements from 3 aluminum core TRACERs, and n = 12 measurements from 2 acrylic core TRACERs.

**Supplementary Table 1: Summary table showing fold change in metabolite level between shGFP versus shHIF in layer 1 samples**

| Metabolite           | Fold Change | p-value | Benjamin-Hochberg significant p- value |
|----------------------|-------------|---------|----------------------------------------|
| Palmitoyl_Carnitine* | 5.0338      | 0.0002  | 0.0006                                 |
| Oleyl_Carnitine*     | 4.4996      | 0.0002  | 0.0011                                 |
| Stearoyl_Carnitine   | 4.4135      | 0.0437  | 0.0163                                 |
| Glucosamine*         | 4.2002      | 0.0004  | 0.0017                                 |
| Kynurenine*          | 3.0236      | 0.0042  | 0.0062                                 |
| Palmitoleic_Acid     | 2.8536      | 0.3362  | 0.0348                                 |
| HEPES                | 2.4895      | 0.1475  | 0.0281                                 |
| Urea                 | 2.4512      | 0.1400  | 0.0264                                 |
| Citrulline           | 2.3271      | 0.0312  | 0.0140                                 |
| O.AcetylSerine*      | 2.1904      | 0.0033  | 0.0045                                 |
| Succinate            | 2.0989      | 0.0570  | 0.0191                                 |
| Amino.isovalerate    | 2.0859      | 0.2954  | 0.0337                                 |
| Glucose              | 2.0479      | 0.0415  | 0.0157                                 |
| Argininosuccinate    | 1.9513      | 0.0367  | 0.0152                                 |
| Linoleic_Acid        | 1.9354      | 0.2086  | 0.0320                                 |
| AMP                  | 1.8304      | 0.3747  | 0.0365                                 |
| Malate*              | 1.8083      | 0.0013  | 0.0028                                 |
| Oleic_Acid           | 1.8011      | 0.1626  | 0.0292                                 |
| Gluconate            | 1.7660      | 0.1148  | 0.0242                                 |
| Hexose               | 1.7094      | 0.0651  | 0.0208                                 |
| Ethanolamine         | 1.6347      | 0.0209  | 0.0112                                 |
| Valine               | 1.5851      | 0.0344  | 0.0146                                 |
| Serine*              | 1.5769      | 0.0037  | 0.0051                                 |
| Glycine*             | 1.5416      | 0.0012  | 0.0022                                 |
| Kynurenic_acid_pos   | 1.5414      | 0.3237  | 0.0343                                 |
| Citrate              | 1.5310      | 0.0525  | 0.0180                                 |
| Acetoacetate         | 1.5149      | 0.1458  | 0.0275                                 |
| Pyroglutamic_Acid    | 1.5078      | 0.0106  | 0.0096                                 |
| Taurin               | 1.4849      | 0.0118  | 0.0101                                 |
| Fumarate*            | 1.4818      | 0.0019  | 0.0034                                 |
| GSH                  | 1.4808      | 0.1232  | 0.0253                                 |
| Lysine               | 1.4512      | 0.0561  | 0.0185                                 |
| N.AcetylAspartate    | 1.4450      | 0.0736  | 0.0219                                 |
| Ribulose             | 1.4390      | 0.1357  | 0.0258                                 |
| Tyrosine*            | 1.4235      | 0.0056  | 0.0079                                 |
| Glycerol             | 1.4231      | 0.4696  | 0.0382                                 |
| Norepinephrine       | 1.4194      | 0.0614  | 0.0202                                 |
| Alanine              | 1.4181      | 0.0660  | 0.0213                                 |
| Aspartate*           | 1.4180      | 0.0051  | 0.0073                                 |
| Creatinine           | 1.3910      | 0.0219  | 0.0118                                 |
| Myristic_Acid        | 1.3861      | 0.5926  | 0.0410                                 |
| Leucine              | 1.3837      | 0.0266  | 0.0135                                 |
| Glutamate*           | 1.3797      | 0.0020  | 0.0039                                 |



|                                |        |        |        |
|--------------------------------|--------|--------|--------|
| Methionine                     | 1.3773 | 0.0489 | 0.0169 |
| Phenylalanine                  | 1.3764 | 0.0099 | 0.0090 |
| Ornithine                      | 1.3758 | 0.0504 | 0.0174 |
| Palmitic_Acid                  | 1.3742 | 0.6308 | 0.0421 |
| X3.hydroxykinurenine           | 1.3682 | 0.0232 | 0.0129 |
| HexosePhosphate                | 1.3631 | 0.6874 | 0.0438 |
| X2.HG                          | 1.3594 | 0.1680 | 0.0303 |
| Glutamine                      | 1.3565 | 0.1445 | 0.0270 |
| Dihydrothymine                 | 1.3564 | 0.1501 | 0.0287 |
| Asparagine                     | 1.3380 | 0.0914 | 0.0230 |
| Cytosine*                      | 1.3340 | 0.0045 | 0.0067 |
| Phosphorylcholine              | 1.3321 | 0.2571 | 0.0326 |
| Threonine*                     | 1.3288 | 0.0037 | 0.0056 |
| GSSG                           | 1.3247 | 0.6495 | 0.0433 |
| Choline                        | 1.3104 | 0.0584 | 0.0197 |
| Guanine                        | 1.2966 | 0.1139 | 0.0236 |
| Proline                        | 1.2779 | 0.0228 | 0.0124 |
| Cinnamate                      | 1.2679 | 0.1653 | 0.0298 |
| Lactate                        | 1.2613 | 0.1824 | 0.0315 |
| Stearic_Acid                   | 1.1939 | 0.7538 | 0.0472 |
| NAD                            | 1.1680 | 0.5691 | 0.0399 |
| S.Adenosyl.Methionine          | 1.1378 | 0.7222 | 0.0461 |
| GABA                           | 1.1362 | 0.2878 | 0.0331 |
| Adenine                        | 1.1250 | 0.6928 | 0.0444 |
| S.Adenosyl.Homocysteine        | 1.1220 | 0.5640 | 0.0393 |
| Arginine                       | 1.1114 | 0.5954 | 0.0416 |
| Pyruvate                       | 1.0942 | 0.6930 | 0.0449 |
| Nicotinamide                   | 1.0862 | 0.7366 | 0.0466 |
| Xanthine                       | 1.0760 | 0.4601 | 0.0376 |
| Agmatine                       | 1.0729 | 0.7994 | 0.0478 |
| Adenosine                      | 1.0611 | 0.8853 | 0.0489 |
| Uracil                         | 1.0282 | 0.8054 | 0.0483 |
| Propionylcarnitine             | 0.9737 | 0.9435 | 0.0500 |
| Aconitate                      | 0.9699 | 0.7217 | 0.0455 |
| AcetylCholine                  | 0.9342 | 0.6437 | 0.0427 |
| Pentose_Phosphate              | 0.9304 | 0.9072 | 0.0494 |
| Carnitine                      | 0.9200 | 0.5089 | 0.0388 |
| aKG                            | 0.8729 | 0.3629 | 0.0360 |
| ButyrylCarnitine               | 0.8513 | 0.5881 | 0.0404 |
| Hypoxanthine                   | 0.8340 | 0.1199 | 0.0247 |
| Glycerolphosphorylethanolamine | 0.8242 | 0.0829 | 0.0225 |
| Acetylcarnitine                | 0.8130 | 0.1721 | 0.0309 |
| Glyceraldehyde_3.phosphate     | 0.6841 | 0.4183 | 0.0371 |
| Glycerate                      | 0.6678 | 0.3585 | 0.0354 |
| Glycerolphosphorylcholine*     | 0.6609 | 0.0073 | 0.0084 |
| Tryptophan                     | 0.4775 | 0.0192 | 0.0107 |

Supplementary Table 2: Comparison of cell numbers required for TRACERs with different geometries

| w (cm) | d (cm) | t (cm) | cell density/ml | cells/layer | total # cells* |
|--------|--------|--------|-----------------|-------------|----------------|
| 1      | 0.6    | 0.004  | 100,000,000     | 753,982     | 4,523,893      |
| 0.5    | 0.6    | 0.004  | 100,000,000     | 376,991     | 2,261,947      |
| 0.1    | 0.6    | 0.004  | 100,000,000     | 75,398      | 452,389        |
| 1      | 0.1    | 0.004  | 10,000,000      | 12,566      | 75,398         |
| 0.5    | 0.1    | 0.004  | 10,000,000      | 6,283       | 37,699         |
| 0.1    | 0.1    | 0.004  | 10,000,000      | 1,257       | 7,540          |

\*Assuming 6 layer TRACER

**w** biocomposite strip width

**d** core diameter

**t** construct thickness

highlighted line indicates current TRACER design

### Supplementary Table 3: Details of antibodies used

| Antibody                         | Figure in Paper                                         | Supplier                                            | Catalogue Number | Clone Number | Reference                                                                                                                                                         |
|----------------------------------|---------------------------------------------------------|-----------------------------------------------------|------------------|--------------|-------------------------------------------------------------------------------------------------------------------------------------------------------------------|
| Anti-EF5-Cy3 (ELK3-51)           | 3a,b,c,h<br>SI 11a,b<br>SI 12a,b<br>SI 13a,b,c<br>SI 19 | University of Pennsylvania<br>(Hypoxia-Imaging.org) |                  |              | Koch CJ. Measurement of absolute oxygen levels in cells and tissues using oxygen sensors and 2-nitroimidazole EF5. <i>Methods in Enzymology</i> . 352:3-31, 2002. |
| Anti-Ki-67                       | SI 2f                                                   | Merck Millipore                                     | AB9260           |              |                                                                                                                                                                   |
| Anti-ZO1                         | SI 7a,b,c,d                                             | InVitrogen                                          | 339100           |              |                                                                                                                                                                   |
| Anti-HIF1 $\alpha$               | SI 15a,b                                                | GeneTex                                             | GTX61608         |              |                                                                                                                                                                   |
| Anti-CA9                         | SI 16a                                                  | Gift from Dr. Silvia Pastorekova                    |                  | M75          | Pastorekova S, Zavadova Z, Kostal M, Babusikova O and Zavada J (1992) A novel quasi-viral agent, MaTu, is a two-component system. <i>Virology</i> 187: 620–626    |
| Anti- $\beta$ -tubulin           | SI 16a                                                  | Abcam                                               | ab6046           |              |                                                                                                                                                                   |
| Secondary Goat Anti-Rabbit TRITC | SI 13a,b                                                | Sigma                                               | T-6778           |              |                                                                                                                                                                   |
| Secondary Goat Anti-Mouse 488    | SI 7a,b,c,d                                             | Life Technologies                                   | A11029           |              |                                                                                                                                                                   |
| Secondary Goat Anti-Rabbit 488   | SI 2f                                                   | ThermoFisher Scientific                             | A-11008          |              |                                                                                                                                                                   |

Supplementary Table 4: Details of statistics

| Figure | Device n      | Technical Replicate per Layer      | n used in statistics/ error bars | Statistics Performed                 | Test Assumptions                                                    | Justification of Test Choice                                                                      |
|--------|---------------|------------------------------------|----------------------------------|--------------------------------------|---------------------------------------------------------------------|---------------------------------------------------------------------------------------------------|
| 2A     | 3             | 3                                  | 3                                | ANOVA Bonferroni or Games-Howell     | normality and equal (Bonferroni) or unequal (Games-Howell) variance | Levene's test for homogeneity used to test equal variance; QQ plot used to test normality         |
| 2B     | 3             | 3                                  | 3                                | Bonferroni or Games-Howell post-test | normality and equal (Bonferroni) or unequal (Games-Howell) variance | Levene's test for homogeneity used to test equal variance; QQ plot used to test normality         |
| 2C     | 3             | 1                                  | 3                                | ANOVA Games-Howell post-test         | normality and unequal variance                                      | Levene's test for homogeneity used to test equal variance; QQ plot used to test normality         |
| 2D     | 6h: 3, 24h: 4 | 6                                  | 6h: 3, 24h: 4                    | N/A                                  |                                                                     |                                                                                                   |
| 2E     | 2             | 9 (1 or 2 dilutions in triplicate) | 9                                | T test with Bonferroni correction    | normality and equal variance                                        | F test used to test equal variance; QQ plot used to test normality                                |
| 3B     | 3             | 6                                  | 3                                | N/A                                  |                                                                     |                                                                                                   |
| 3C     | 3             | 6                                  | 3                                | N/A                                  |                                                                     |                                                                                                   |
| 3D     | 3             | 1                                  | 3                                | ANOVA Dunnett post-test              | normality and equal variance                                        | Test for comparing multiple groups to a control group (layer 1). Normality confirmed by QQ plots. |
| 3E     | 3             | 1                                  | 3                                | ANOVA Dunnett post-test              | normality and equal variance                                        | Test for comparing multiple groups to a control group (layer 1). Normality confirmed by QQ plots. |
| 3F     | 3             | 1                                  | 3                                | ANOVA Dunnett post-test              | normality and equal variance                                        | Test for comparing multiple groups to a control group (layer 1). Normality confirmed by QQ plots. |
| 3G     | 3             | 1                                  | 3                                | ANOVA Dunnett post-test              | normality and equal variance                                        | Test for comparing multiple groups to a control group (layer 1). Normality confirmed by QQ plots. |
| 3H     | 3             | 6                                  | 3                                | ANOVA Bonferroni or Games-Howell     | normality and unequal variance                                      | Test for comparing multiple groups to a control group (layer 1). Normality confirmed by QQ plots. |

|        |            |        |                    |                                            |                                                                       |                                                                                                  |
|--------|------------|--------|--------------------|--------------------------------------------|-----------------------------------------------------------------------|--------------------------------------------------------------------------------------------------|
| 4      | 4          | 1      | 4                  | Pearson or Spearman Correlation            | normality and collinearity                                            | Shapiro Wilk's test and Ramsey Regression Equation Specification Error Test (RESET)              |
| SI 2E  | 3          | 3      | 3                  | ANOVA Bonferroni or Games-Howell post-test | normality and equal (Bonferroni) or unequal (Games-Howell) variance   | Levene's test for homogeneity used to test equal variance; QQ plot used to test normality        |
| SI 2F  | 3          | 3      | 3                  | ANOVA Bonferroni or Games-Howell post-test | normality and equal (Bonferroni) or unequal (Games-Howell) variance   | Levene's test for homogeneity used to test equal variance; QQ plot used to test normality        |
| SI 3   | 1          | 3      | 3                  | N/A                                        |                                                                       |                                                                                                  |
| SI 5A  | 1          | 12     | 12                 | ANOVA Bonferroni or Games-Howell post-test | normality and equal (Bonferroni) or unequal (Games-Howell) variance   | Levene's test for homogeneity used to test equal variance; QQ plot used to test normality        |
| SI 5B  | 1          | 12     | 12                 | N/A                                        |                                                                       |                                                                                                  |
| SI 10  | 1 or 2     | 1 to 5 | 6 to 15            | T test with Bonferroni correction          | Normality and un-equal variance                                       | F test used to test equal variance; QQ plot used to test normality                               |
| SI 11b | 3          | 6      | 18                 | N/A                                        |                                                                       |                                                                                                  |
| SI 13a | 1          | 6      | 6                  | pooled T-test                              | normality and equal variance                                          | F test used to test equal variance; QQ plot used to test normality                               |
| SI 14  | 3          | 1      | 3                  | ANOVA Dunnett post-test                    | normality and equal variance                                          | Test for comparing multiple groups to a control group (layer 1). Normality confirmed by QQ plots |
| SI 16b | 3          | 1      | 3                  | T test with Bonferroni correction          | normality and equal (pooled test) or unequal variance (unpooled test) | F test used to test equal variance; QQ plot used to test normality                               |
| SI 17  | 4          | 1      | 4                  | N/A                                        |                                                                       |                                                                                                  |
| SI 18  | 4          | 1      | 4                  | Pearson or Spearman Correlation            | normality and collinearity                                            | Shapiro Wilk's test and Ramsey Regression Equation Specification Error Test (RESET)              |
| SI 19  | Al 3, Ac 2 | 6      | Al: n=18, Ac: n=12 | N/A                                        |                                                                       |                                                                                                  |
